# Supplementary material for: Enzymatic Defluorination of Perfluorooctanoic Acid by an Evolutionarily Distinct Haloacid Dehalogenase
Source: Research Square preprint supplement (doi:10.21203/rs.3.rs-10043589/v1), 2026-07-22
Supplement: Supplementary file 1 [file 6f8c86d60c2cd803aca550ee.docx]

**Supplementary Information**

**Enzymatic Defluorination of Perfluorooctanoic Acid by an Evolutionarily Distinct Haloacid Dehalogenase**

*Milad Torabfam 1, Gizem Celebi Torabfam 2, Stephen Kurilla 1, Cristiano Dias 2, Omowunmi Sadik 1**

1 Department of Chemistry and Environmental Sciences, 161 Warren Street, New Jersey Institute of Technology, University Heights, Newark, NJ 07102, USA

2 Department of Physics, 161 Warren Street, New Jersey Institute of Technology, University Heights, Newark, NJ 07102, USA


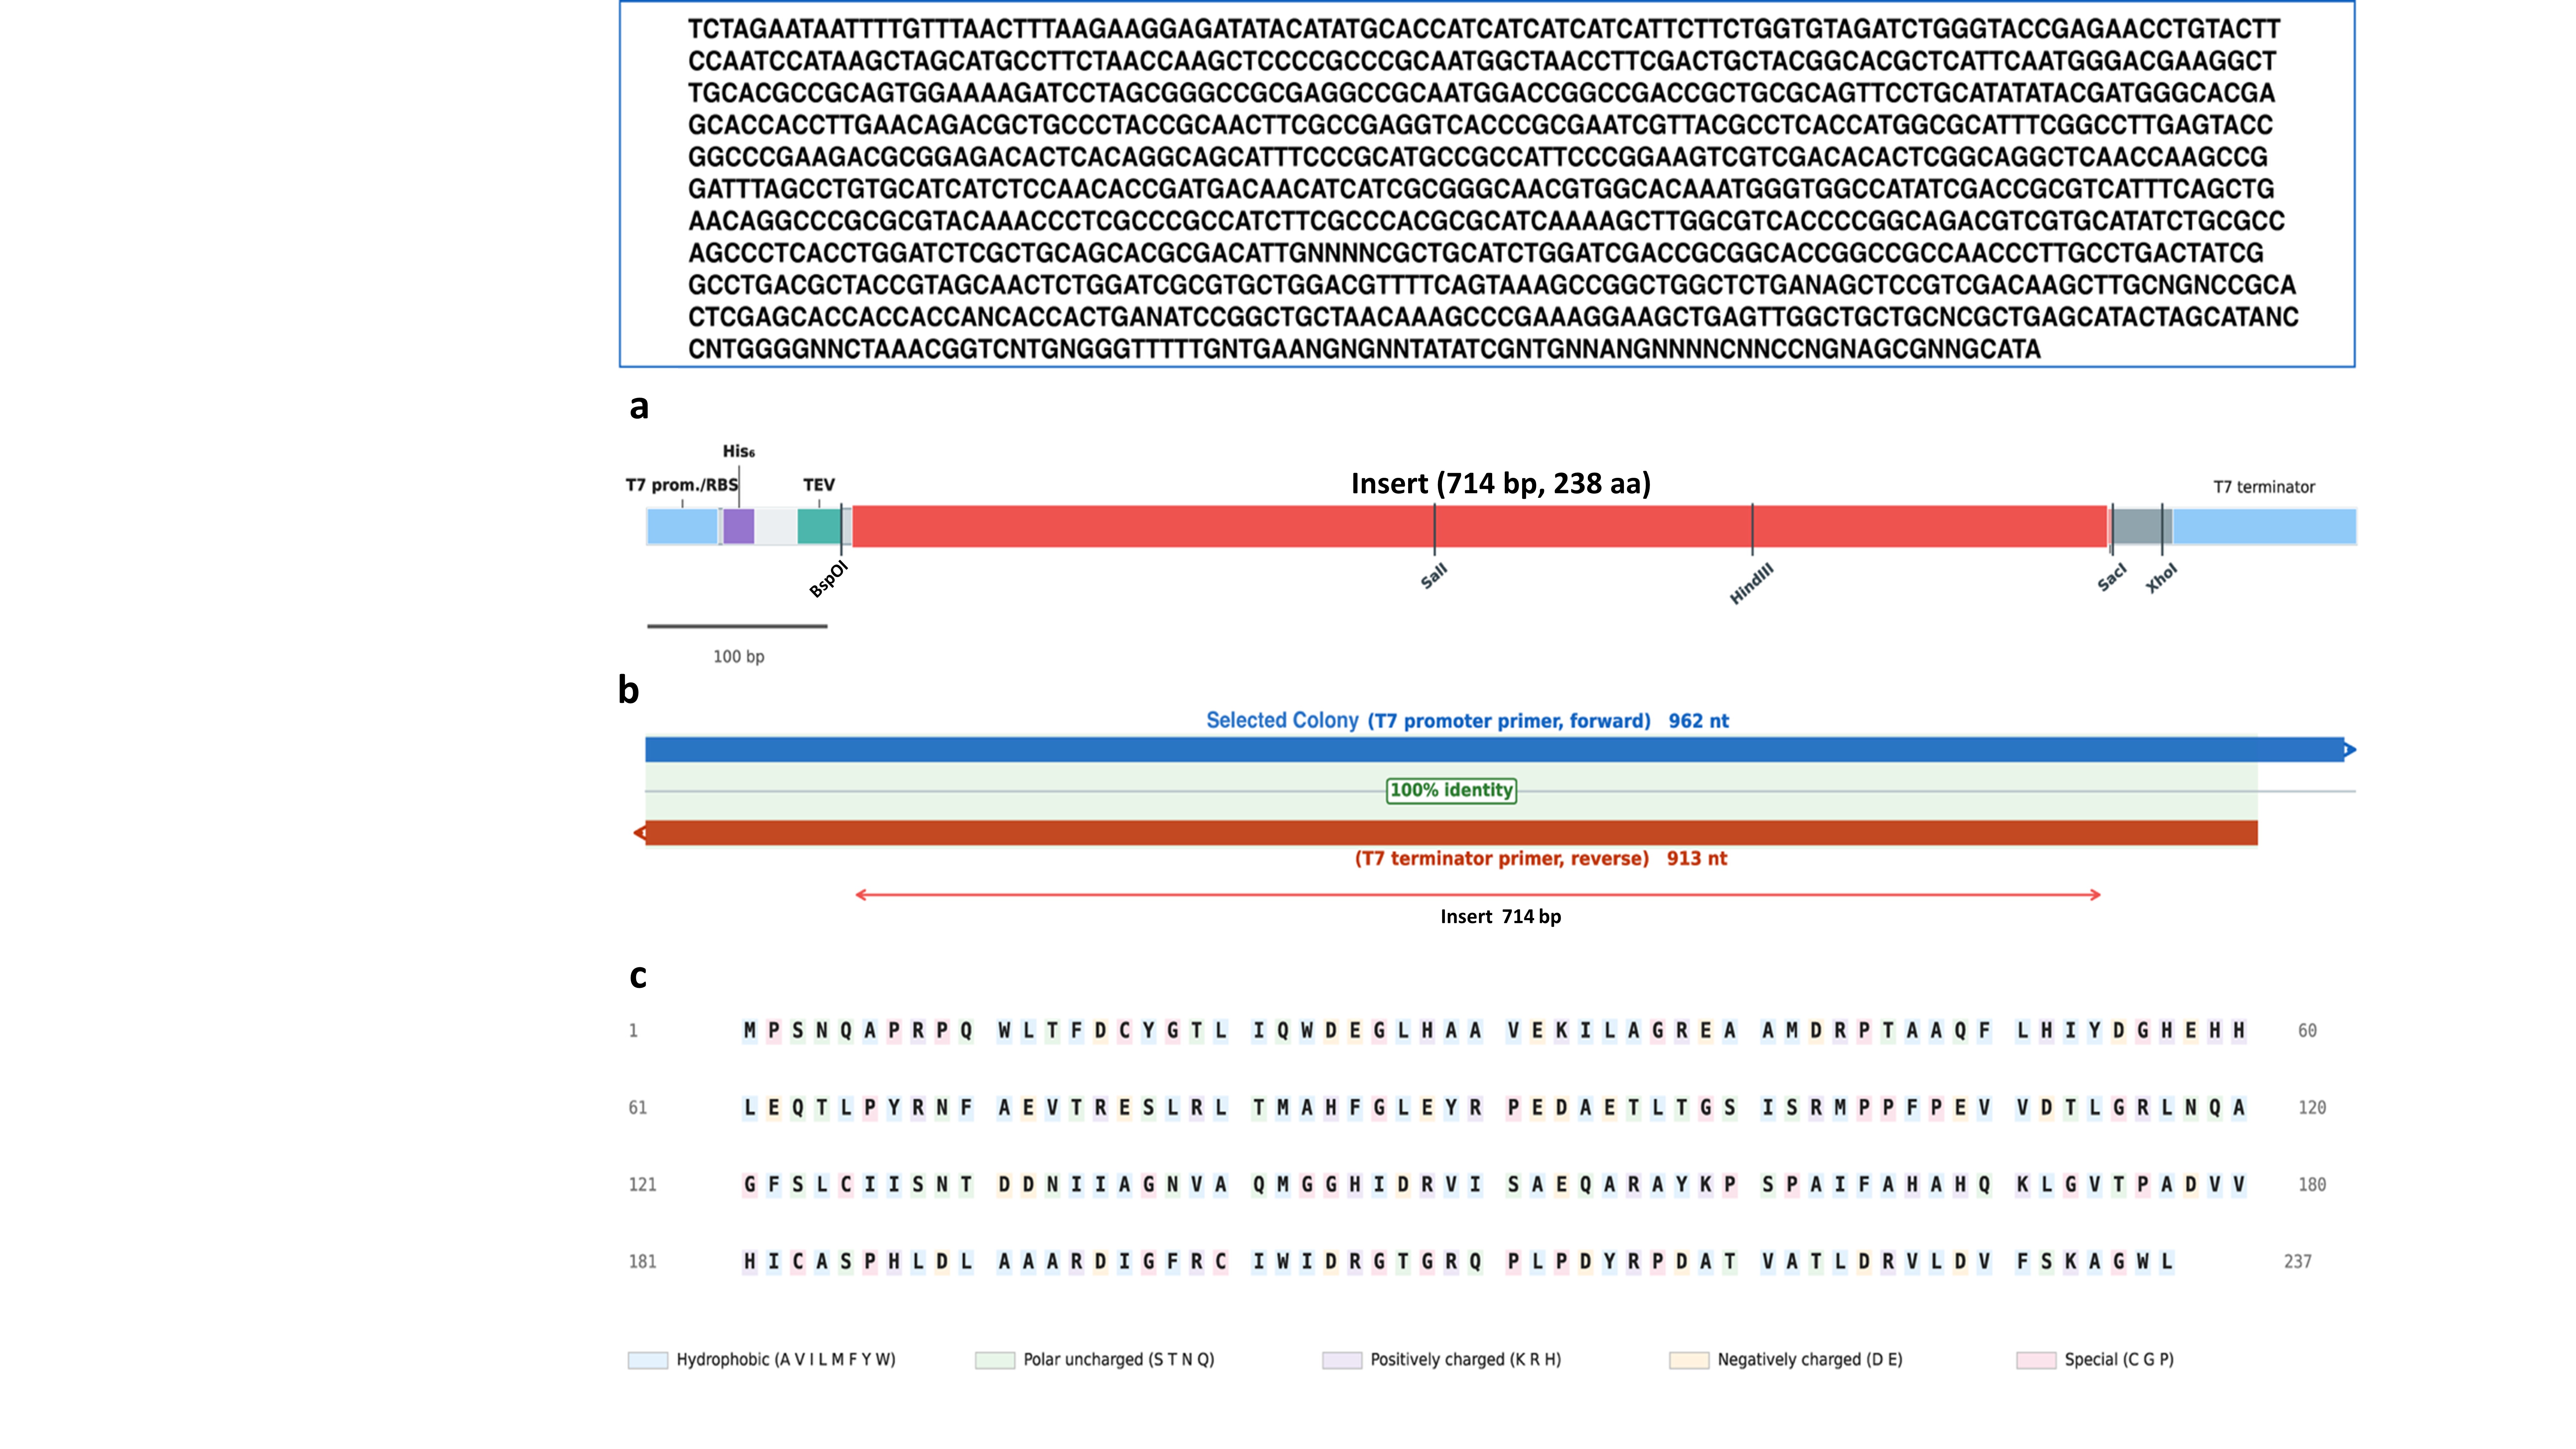


**Figure S1. a)** Linear map of the pET21a-LIC expression construct. The insert (714 bp, 238 aa) is flanked by BspOI (5′) and a TGA stop codon followed by SacI (3′); the N-terminal cassette encodes a His₆ affinity tag and TEV protease site. **b)** Sanger sequencing reads from T7 promoter (forward, 962 nt) and T7 terminator (reverse, 913 nt) primers provide complete double-stranded coverage of the insert with 100% sequence identity, confirming correct cloning without mutations. **c)** Deduced amino acid sequence of the insert (238 aa) translated from the confirmed nucleotide sequence. Residues are color-coded by physicochemical class: hydrophobic (blue), polar uncharged (green), positively charged (purple), negatively charged (orange), and special residues C/G/P (pink).


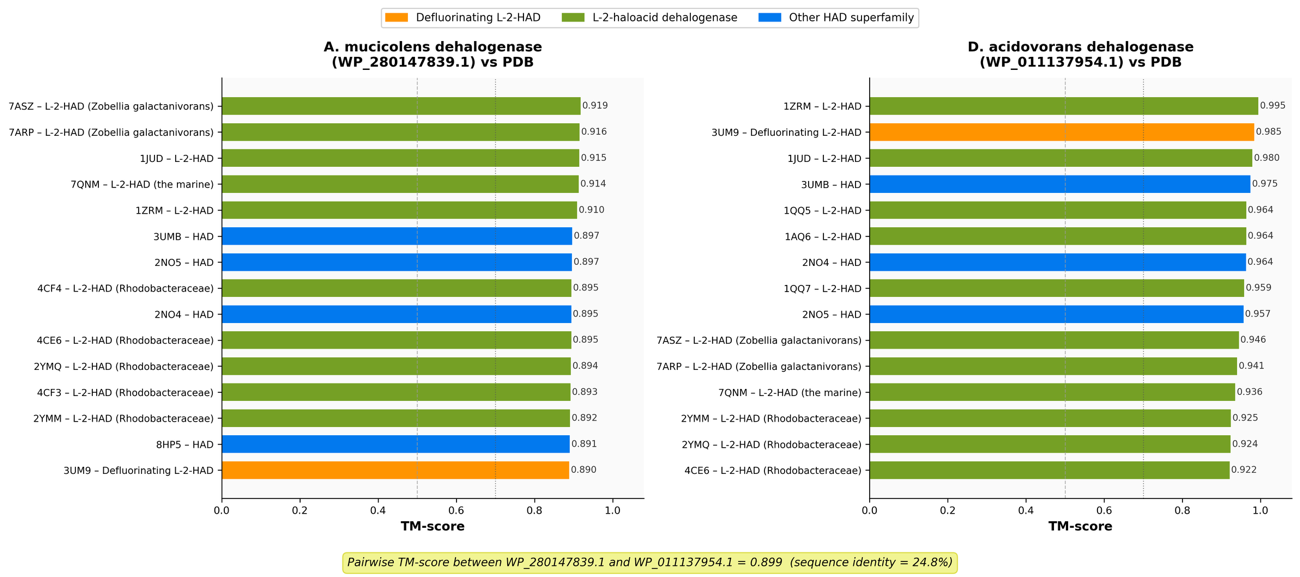


**Figure S2. Structural homology of the *A. mucicolens* and *D. acidovorans* L-2-haloacid dehalogenases confirmed by Foldseek TM-align searches against the PDB.** Three-dimensional structures of WP_280147839.1 (A. mucicolens; left panel) and WP_011137954.1 (*D. acidovorans*; right panel) were predicted using Boltz-2 and searched against the RCSB Protein Data Bank using Foldseek with TM-align scoring. Horizontal bars show the TM-score for the top 15 unique PDB hits per query, sorted in descending order. Bars are color-coded by functional category: orange, defluorinating L-2-haloacid dehalogenases; green, L-2-haloacid dehalogenases; blue, other HAD superfamily members. Dashed vertical lines indicate the same-fold threshold (TM-score = 0.5) and the same-superfamily threshold (TM-score = 0.7). The pairwise TM-score between the two predicted structures (0.899 at 24.8% sequence identity) is shown at the bottom. PDB accession codes are indicated for each hit. All 50 hits returned for each query exceeded TM-score 0.70, confirming unambiguous assignment to the HAD-II (L-2-haloacid dehalogenase) structural superfamily. Boltz-2 model quality: pTM = 0.935, pLDDT = 0.931 (WP_280147839.1); pTM = 0.951, pLDDT = 0.956 (WP_011137954.1). Foldseek searches against the PDB returned 50 significant hits for each query (e-value < 0.01). For the *A. mucicolens* enzyme (WP_280147839.1), all 50 hits had TM-scores exceeding 0.70, the threshold indicative of the same structural superfamily, with the top hit being the *Zobellia galactanivorans* L-2-haloacid dehalogenase (PDB: 7ASZ; TM-score = 0.919). Notably, two structurally characterized defluorinating L-2-haloacid dehalogenases - Bpro0530 (PDB: 3UM9; TM-score = 0.890) and Rha0230 (PDB: 3UMG; TM-score = 0.852) - ranked among the top structural matches, alongside the *Xanthobacter autotrophicus* L-2-haloacid dehalogenase (PDB: 1QQ5; TM-score = 0.869). For the *D. acidovorans* enzyme (WP_011137954.1), all 50 hits likewise exceeded a TM-score of 0.70, with the top hit being the L-2-haloacid dehalogenase reaction intermediate structure (PDB: 1ZRM; TM-score = 0.995), and the defluorinating dehalogenase Bpro0530 ranking second (PDB: 3UM9; TM-score = 0.985). The pairwise TM-score between the two predicted structures was 0.899, confirming near-identical fold topology despite only 24.8% sequence identity at the structural alignment level. Together, these results unambiguously establish that both enzymes adopt the HAD-II (L-2-haloacid dehalogenase) fold, and that the *A. mucicolens* enzyme is structurally most similar to experimentally characterised L-2-haloacid dehalogenases, including enzymes with demonstrated defluorination activity.

**
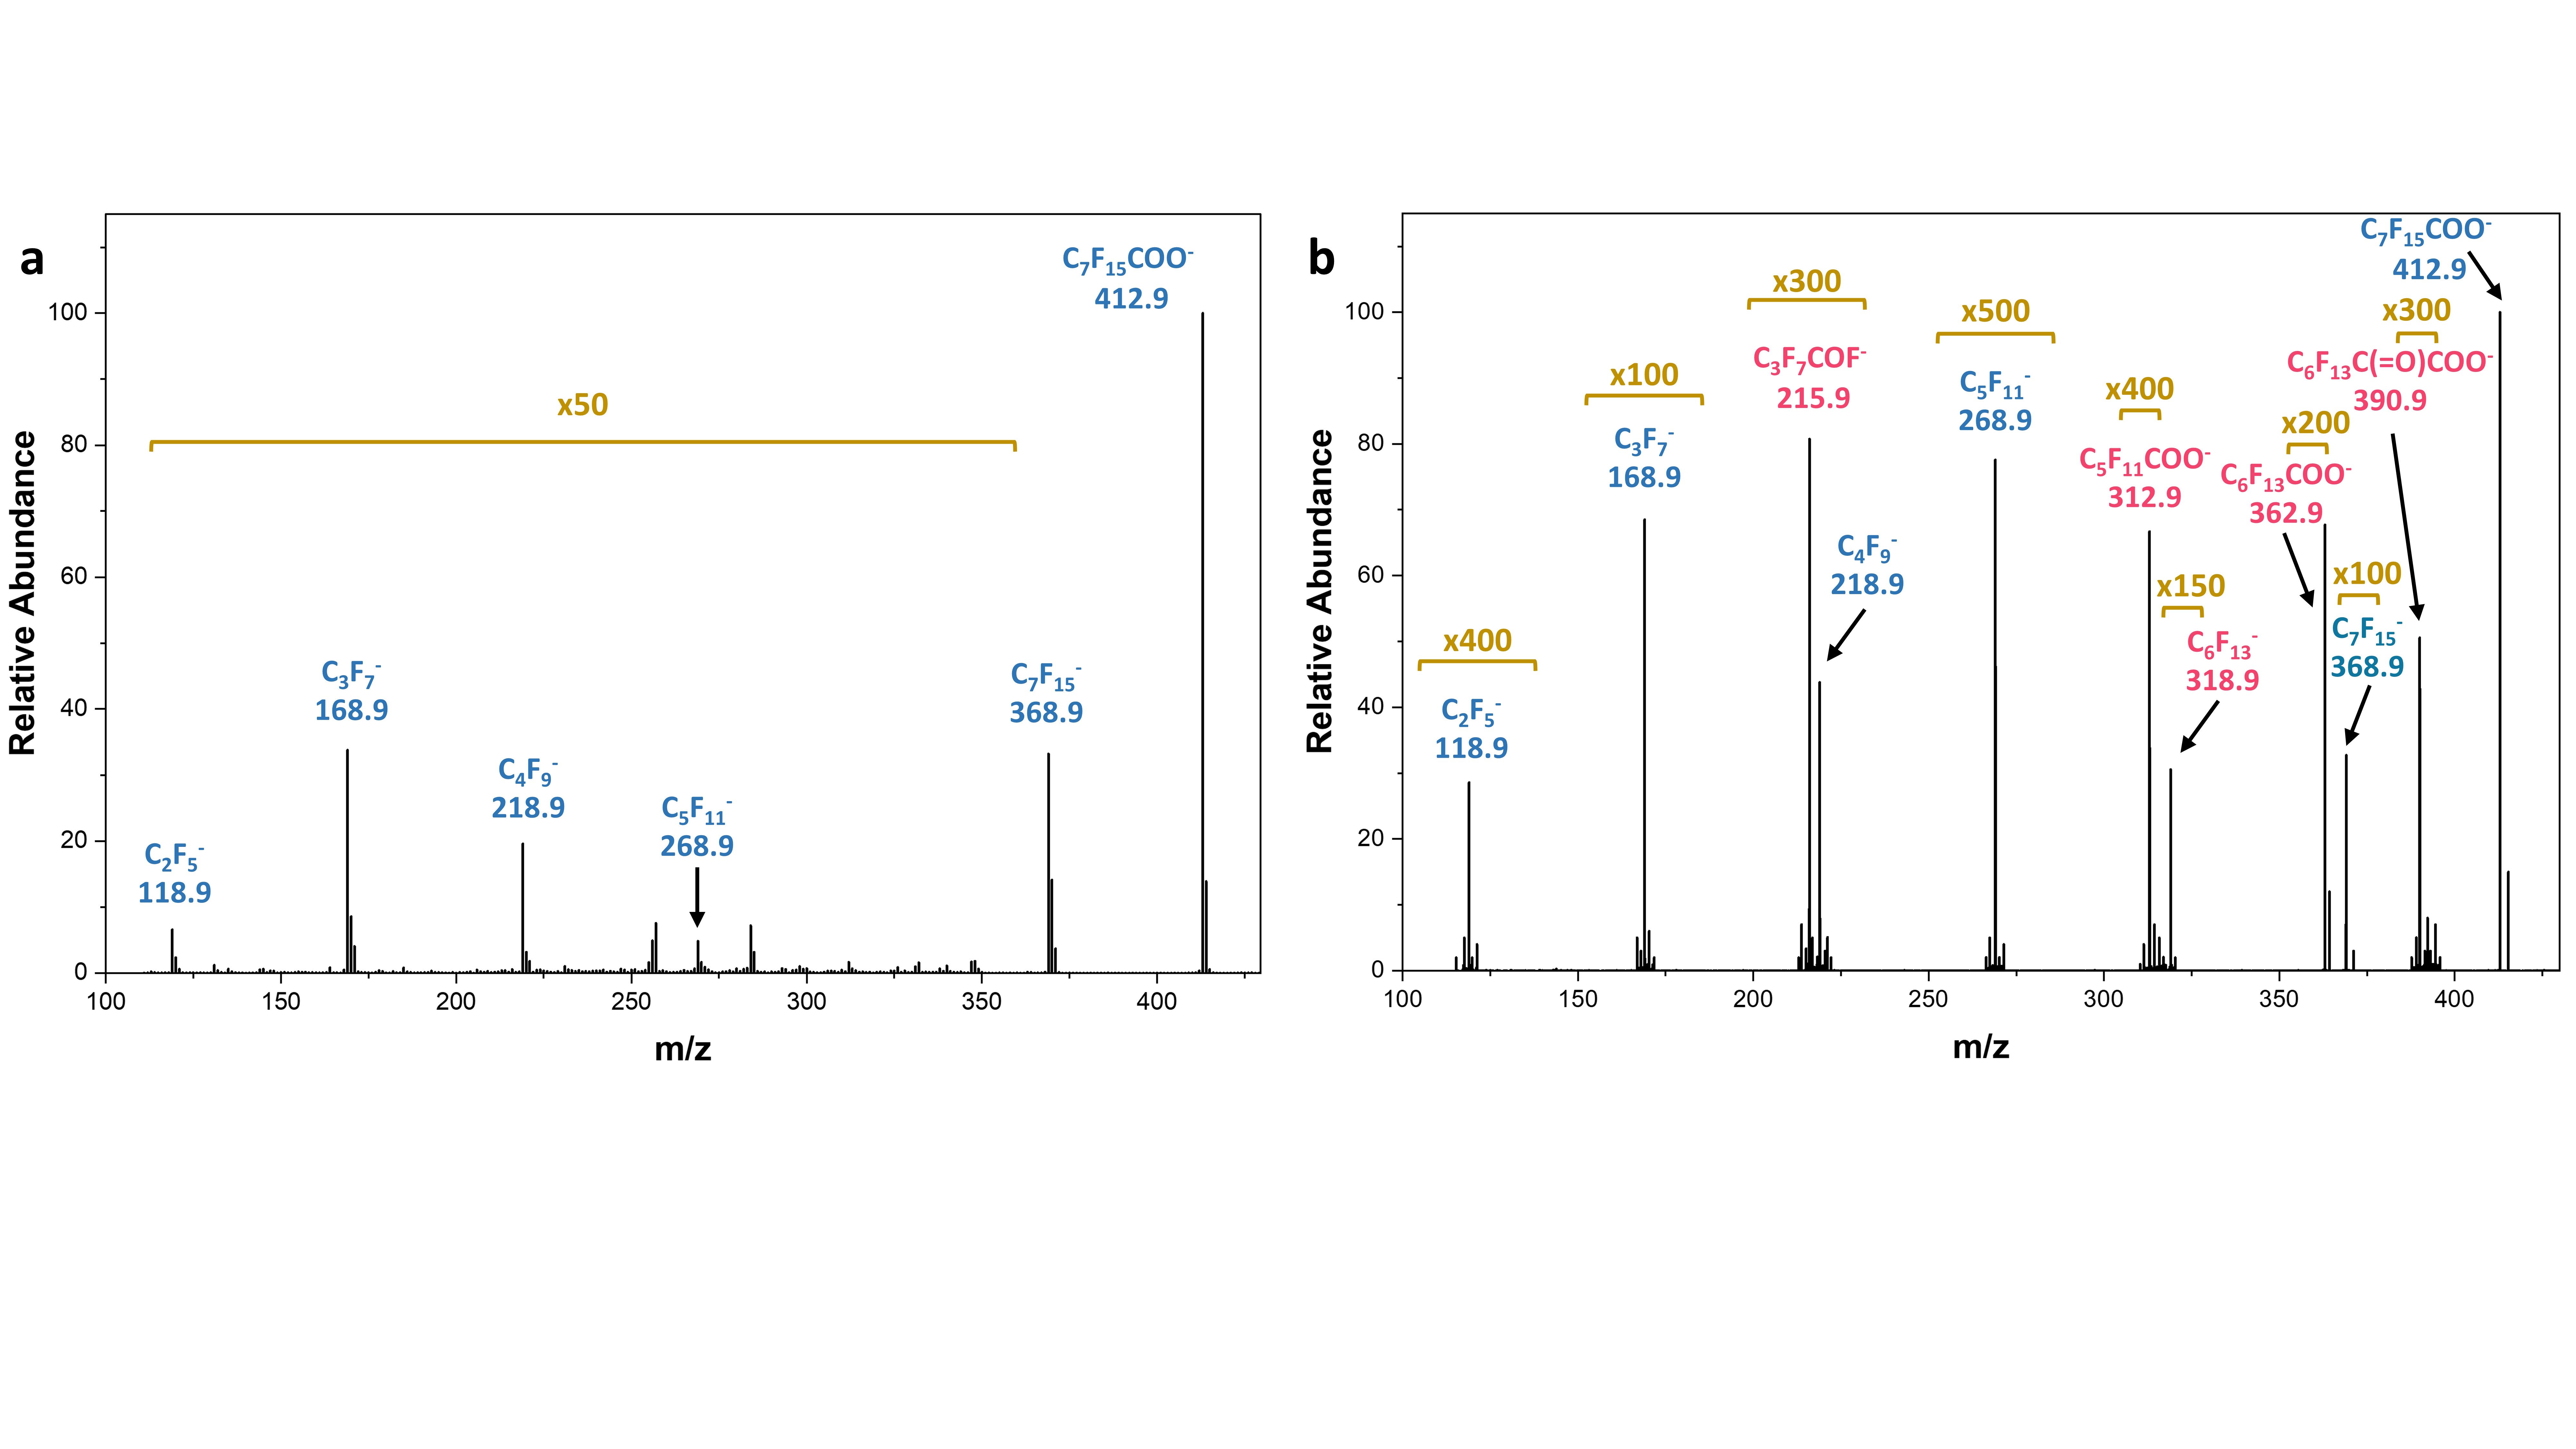
**

**Figure S3.** Negative-ion MS spectra of **a)** untreated PFOA control and **b)** enzymatically treated sample.


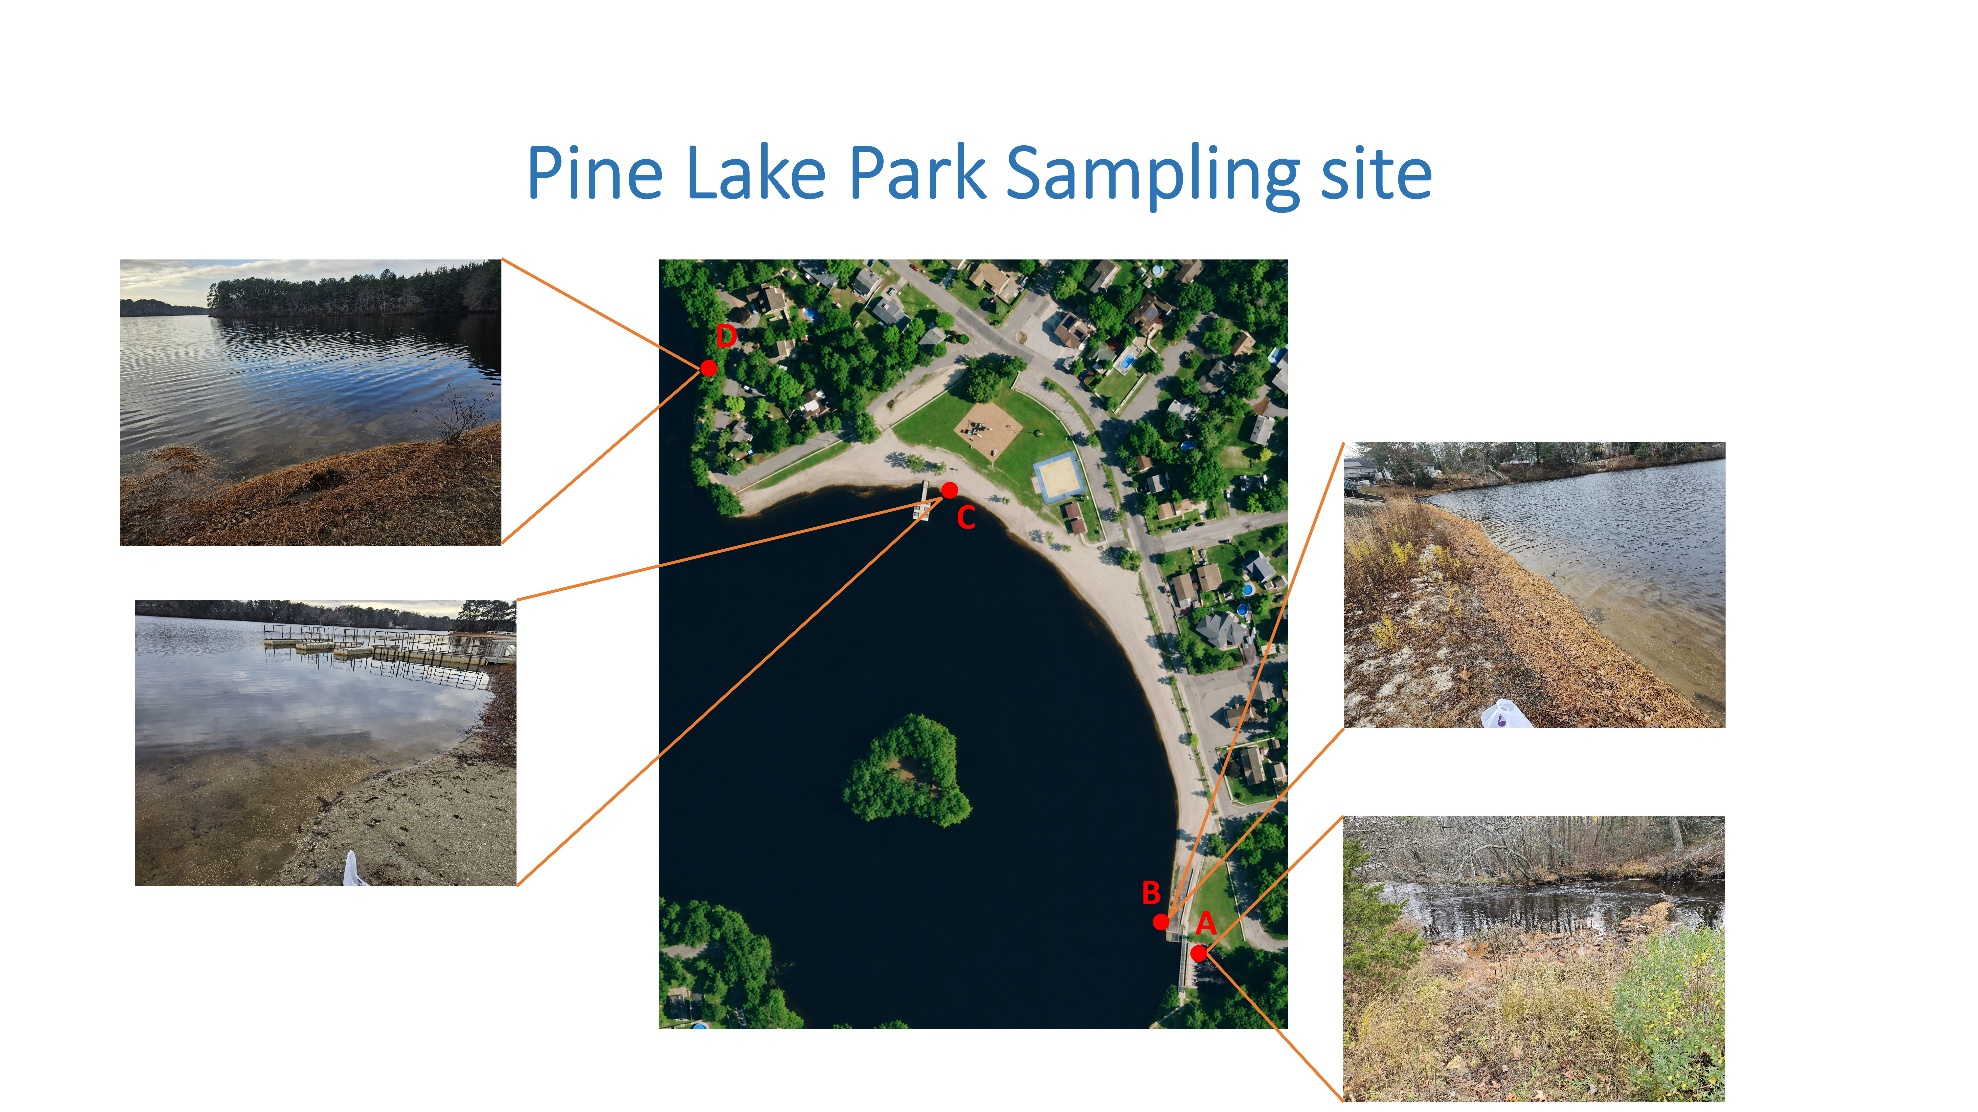


**Figure S4.** Pine Lake Park sampling site in New Jersey. The central image depicts the selected sampling points (A-D) around the PFAS-contaminated lake-associated area, with representative field photographs corresponding to each sampling location. These sites were chosen to capture spatial variability in soil/sediment conditions along the lake area.

**Table S1.** Enzymatic defluorination products of PFOA detected by direct-infusion negative-ion MS.

| Neutral form | Product ions | [M-H]- | Intensity |
| --- | --- | --- | --- |
| C6F13C(=O)COOH | C6F13C(=O)COO- | 390.9640 | 3.891E+03 |
| C6F13COOH | C6F13COO- | 362.9691 | 7.818E+03 |
| C6F13 | C6F13- | 318.9792 | 4.702E+03 |
| C5F11COOH | C5F11COO- | 312.9723 | 3.850E+03 |
| C3F7COF | C3F7COF- | 215.9821 | 6.215E+03 |

**Table S2.** Calibration data parameters for fluoride ion quantification via ISE.

| Nominal Concentration (ppm) | Actual Concentration after Dilution (ppm) | log10 [Concentration] | Mean Potential (mV) | Standard Deviation (± mV) |
| --- | --- | --- | --- | --- |
| 0.02 | 0.01818 | -1.74041 | 137.0 | 4.5 |
| 0.03 | 0.02727 | -1.56431 | 128.5 | 3.0 |
| 0.125 | 0.113625 | -0.94453 | 89.7 | 4.1 |
| 0.25 | 0.22725 | -0.6435 | 71.7 | 2.5 |
| 0.5 | 0.4545 | -0.34247 | 52.7 | 3.0 |
| 1.0 | 0.909 | -0.04144 | 37.7 | 2.1 |
| 5.0 | 4.545 | 0.657534 | -2.9 | 0.7 |

**Table S3.** Mean peak areas and standard deviations across reference concentrations using IC technique**.**

| F concentration (ppm) | Mean area (μS/cm s) | Standard deviation |
| --- | --- | --- |
| 5 | 47.38 | 0.45 |
| 1 | 8.81 | 0.2 |
| 0.1 | 0.91 | 0.032 |
| 0.01 | 0.22 | 0.017 |
